# Supplementary material for: Early-life gut dysbiosis linked to juvenile mortality in ostriches
Source: PubMed Central journal article supplement (PMC7552511; doi:10.1186/s40168-020-00925-7), 2020-10-12
Supplement: 40168_2020_925_MOESM5_ESM.pdf [file 40168_2020_925_MOESM5_ESM.pdf]

**Table S4.** Predicting patterns of mortality from fecal microbiota during preceding ages using Cox proportional hazard models. Regression coefficients  $\pm$  SEs are given and significant predictions are highlighted in bold font (\*P < 0.05, \*\*P < 0.01, \*\*\*P < 0.001).

| Analysis               | Age at fecal sampling (weeks) | Age at death (>weeks)              |                                    |                                    |                                   |
|------------------------|-------------------------------|------------------------------------|------------------------------------|------------------------------------|-----------------------------------|
|                        |                               | 2                                  | 4                                  | 6                                  | 8-12                              |
| Alpha diversity        | 1                             | 0.81 $\pm$ 0.14                    | 0.85 $\pm$ 0.13                    | 0.93 $\pm$ 0.17                    | 0.91 $\pm$ 0.27                   |
|                        | 2                             | -                                  | 0.79 $\pm$ 0.13                    | 0.91 $\pm$ 0.16                    | <b>0.57<math>\pm</math>0.25*</b>  |
|                        | 4                             | -                                  | -                                  | 0.91 $\pm$ 0.14                    | <b>4.02<math>\pm</math>0.59*</b>  |
|                        | 6                             | -                                  | -                                  | -                                  | 0.64 $\pm$ 0.28                   |
| Phylogenetic diversity | 1                             | 0.92 $\pm$ 0.13                    | 0.94 $\pm$ 0.13                    | 0.97 $\pm$ 0.16                    | 1.05 $\pm$ 0.25                   |
|                        | 2                             | -                                  | 1.24 $\pm$ 0.13                    | <b>1.40<math>\pm</math>0.15*</b>   | <b>1.88<math>\pm</math>0.24**</b> |
|                        | 4                             | -                                  | -                                  | 1.39 $\pm$ 0.18                    | <b>1.93<math>\pm</math>0.31*</b>  |
|                        | 6                             | -                                  | -                                  | -                                  | 1.27 $\pm$ 0.23                   |
| Enterobacteriaceae     | 1                             | 1.20 $\pm$ 0.15                    | 1.20 $\pm$ 0.15                    | 1.16 $\pm$ 0.19                    | 1.42 $\pm$ 0.32                   |
|                        | 2                             | -                                  | 1.04 $\pm$ 0.13                    | 0.93 $\pm$ 0.17                    | 0.60 $\pm$ 0.29                   |
|                        | 4                             | -                                  | -                                  | 1.30 $\pm$ 0.15                    | 1.07 $\pm$ 0.25                   |
|                        | 6                             | -                                  | -                                  | -                                  | 1.45 $\pm$ 0.27                   |
| Peptostreptococcaceae  | 1                             | <b>1.72<math>\pm</math>0.13***</b> | <b>1.65<math>\pm</math>0.13***</b> | <b>1.73<math>\pm</math>0.16***</b> | <b>1.72<math>\pm</math>0.26*</b>  |
|                        | 2                             | -                                  | 1.06 $\pm$ 0.13                    | 0.79 $\pm$ 0.19                    | 1.03 $\pm$ 0.30                   |
|                        | 4                             | -                                  | -                                  | 1.13 $\pm$ 0.16                    | 0.53 $\pm$ 0.36                   |
|                        | 6                             | -                                  | -                                  | -                                  | 1.20 $\pm$ 0.30                   |
| Ruminococcaceae        | 1                             | 0.78 $\pm$ 0.14                    | 0.82 $\pm$ 0.15                    | 0.94 $\pm$ 0.19                    | 1.00 $\pm$ 0.35                   |
|                        | 2                             | -                                  | 0.88 $\pm$ 0.14                    | 0.94 $\pm$ 0.17                    | 1.62 $\pm$ 0.36                   |
|                        | 4                             | -                                  | -                                  | 1.13 $\pm$ 0.16                    | 1.66 $\pm$ 0.37                   |
|                        | 6                             | -                                  | -                                  | -                                  | 1.50 $\pm$ 0.30                   |
| Porphyromonadaceae     | 1                             | 1.08 $\pm$ 0.12                    | 1.14 $\pm$ 0.13                    | 1.10 $\pm$ 0.15                    | 0.97 $\pm$ 0.24                   |
|                        | 2                             | -                                  | 0.80 $\pm$ 0.13                    | 0.83 $\pm$ 0.16                    | 0.96 $\pm$ 0.25                   |
|                        | 4                             | -                                  | -                                  | 1.15 $\pm$ 0.17                    | 0.80 $\pm$ 0.31                   |
|                        | 6                             | -                                  | -                                  | -                                  | 1.41 $\pm$ 0.29                   |
| Clostridiaceae         | 1                             | 0.97 $\pm$ 0.14                    | 0.96 $\pm$ 0.14                    | 0.94 $\pm$ 0.17                    | 0.79 $\pm$ 0.26                   |
|                        | 2                             | -                                  | 0.92 $\pm$ 0.14                    | 1.02 $\pm$ 0.16                    | 1.03 $\pm$ 0.30                   |
|                        | 4                             | -                                  | -                                  | 0.93 $\pm$ 0.14                    | 1.11 $\pm$ 0.26                   |
|                        | 6                             | -                                  | -                                  | -                                  | 0.98 $\pm$ 0.27                   |
| Lactobacillaceae       | 1                             | 1.14 $\pm$ 0.10                    | 1.21 $\pm$ 0.11                    | 1.11 $\pm$ 0.19                    | 1.20 $\pm$ 0.25                   |
|                        | 2                             | -                                  | 0.74 $\pm$ 0.14                    | 0.88 $\pm$ 0.17                    | 1.35 $\pm$ 0.27                   |
|                        | 4                             | -                                  | -                                  | 0.94 $\pm$ 0.16                    | 0.94 $\pm$ 0.81                   |
|                        | 6                             | -                                  | -                                  | -                                  | 1.03 $\pm$ 0.92                   |
| Turicibacteraceae      | 1                             | 0.91 $\pm$ 0.14                    | 0.89 $\pm$ 0.15                    | 0.93 $\pm$ 0.18                    | 1.06 $\pm$ 0.29                   |
|                        | 2                             | -                                  | 1.11 $\pm$ 0.14                    | 1.04 $\pm$ 0.17                    | 0.83 $\pm$ 0.31                   |
|                        | 4                             | -                                  | -                                  | 0.74 $\pm$ 0.16                    | 1.19 $\pm$ 0.30                   |
|                        | 6                             | -                                  | -                                  | -                                  | 0.83 $\pm$ 0.25                   |
| S24-7                  | 1                             | 1.22 $\pm$ 0.11                    | <b>1.24<math>\pm</math>0.11*</b>   | <b>1.35<math>\pm</math>0.12*</b>   | <b>1.60<math>\pm</math>0.21*</b>  |
|                        | 2                             | -                                  | 0.97 $\pm$ 0.13                    | 0.99 $\pm$ 0.15                    | 0.63 $\pm$ 0.26                   |
|                        | 4                             | -                                  | -                                  | 1.17 $\pm$ 0.18                    | 1.29 $\pm$ 0.31                   |
|                        | 6                             | -                                  | -                                  | -                                  | 0.99 $\pm$ 0.27                   |
| Lachnospiraceae        | 1                             | 1.04 $\pm$ 0.14                    | 1.06 $\pm$ 0.14                    | 1.12 $\pm$ 0.17                    | 0.92 $\pm$ 0.32                   |
|                        | 2                             | -                                  | 1.10 $\pm$ 0.15                    | 0.93 $\pm$ 0.19                    | 0.62 $\pm$ 0.40                   |
|                        | 4                             | -                                  | -                                  | 1.00 $\pm$ 0.15                    | 1.38 $\pm$ 0.24                   |
|                        | 6                             | -                                  | -                                  | -                                  | 1.46 $\pm$ 0.24                   |
